# Supplementary material
Source: Springer Nature journal article supplement (https://www.springermedizin.de/resource/supplementary/12906_2010_339_MOESM2_ESM.pdf/9519468)

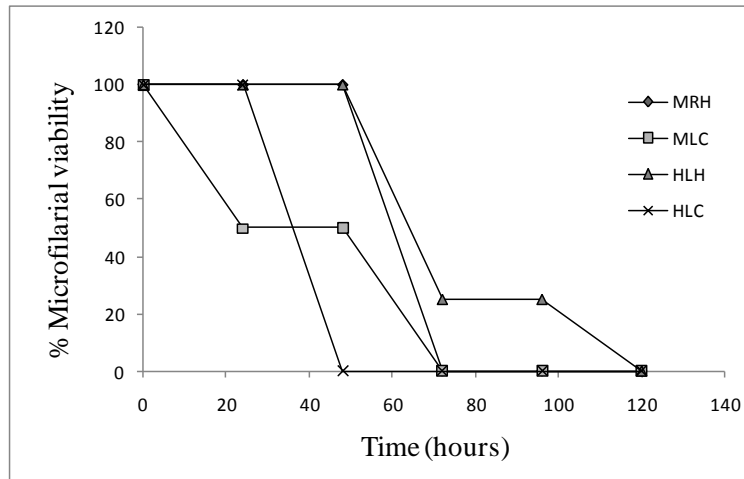

**Figure 2**

Supplement: MOESM2 [file 9519468]
